# Supplementary material
Source: Springer Nature journal article supplement (https://www.springermedizin.de/resource/supplementary/12936_2009_1151_MOESM1_ESM.pdf/9549982)

**Population per  
10km<sup>2</sup>**

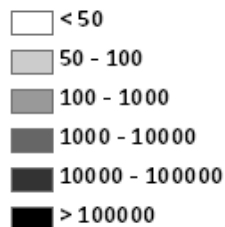

0 20 40 80 120 160  
 Kilometers

Supplement: MOESM1 [file 9549982]
